# Supplementary material for: α,β-Dehydroamino acids in naturally occurring peptides
Source: PubMed Central journal article supplement (PMC4282715; doi:10.1007/s00726-014-1846-4), 2014-10-17

## 1 nisin

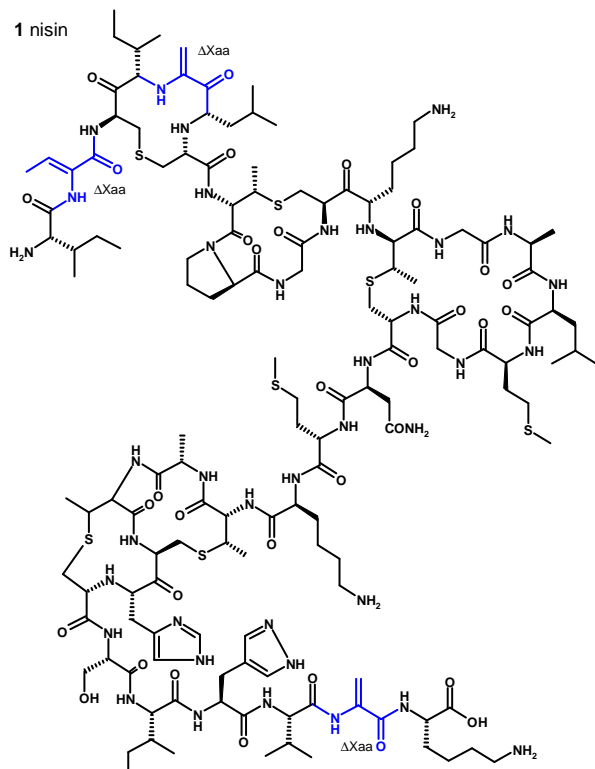

## 2 AM-toxins

AM-toxin I, R = OCH<sub>3</sub>  
 AM-toxin II, R = H  
 AM-toxin III, R = OH

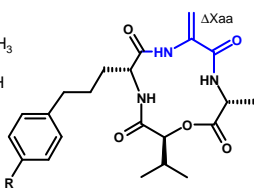

## 3 vitilevuamide

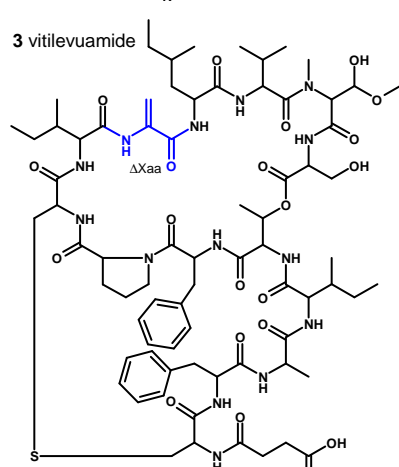

## 4 corpeptin A

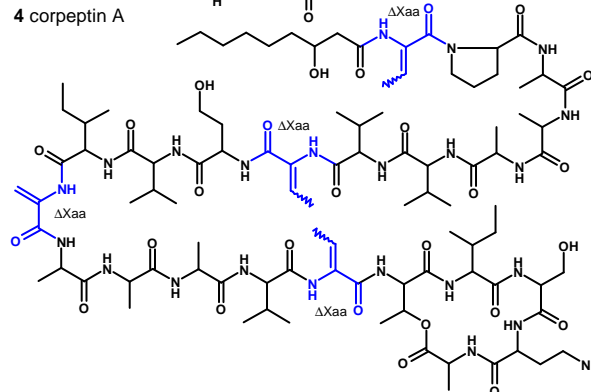

## 5 tolaasins

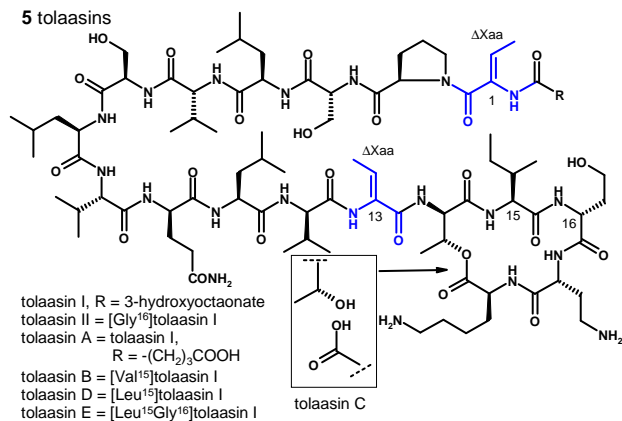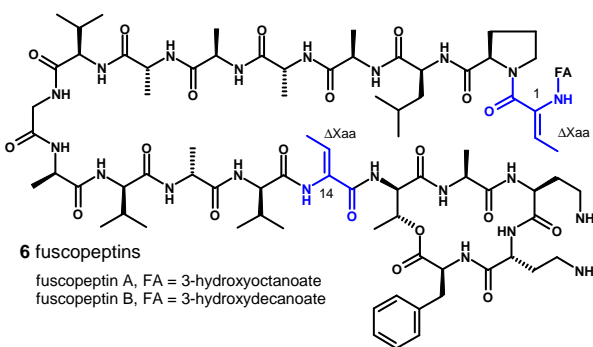

## 7 syringopeptins 25

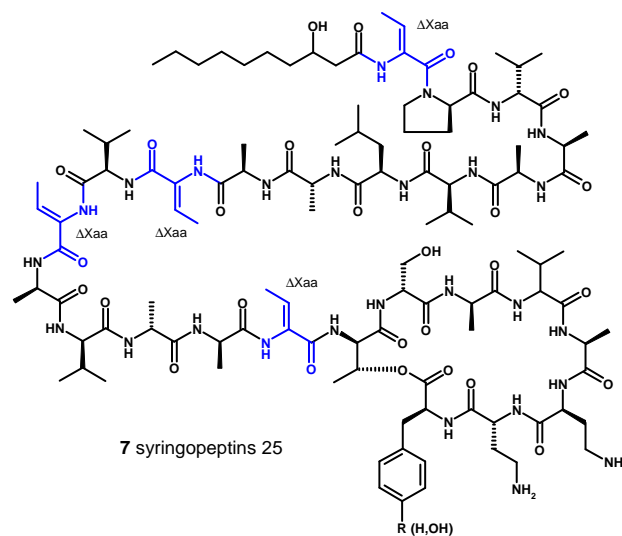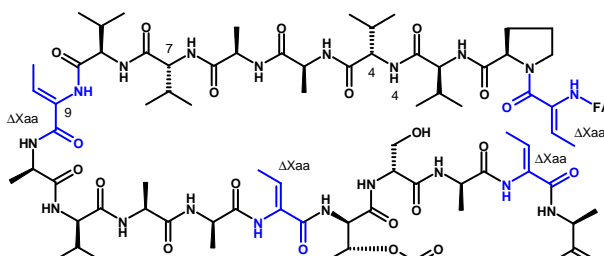

syringopeptin 22A, FA = 3-hydroxydecanoate  
 syringopeptin 22B, FA = 3-hydroxydodecanoate  
 syringopeptin 22 Phv = [Leu<sup>4</sup>,Ala<sup>7</sup>]SP22  
 syringopeptin 22 SC = [Leu<sup>4</sup>,Leu<sup>7</sup>, $\Delta$ Ala<sup>9</sup>]SP22  
 syringopeptin 508 = [Leu<sup>4</sup>,Leu<sup>7</sup>,Ala<sup>9</sup>]SP22

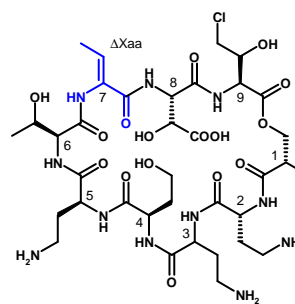**9 syringostatin family**

syringostatin

A, FA = tetradecanoate

B, FA = 3-hydroxytetradecanoate

syringotoxin = [Gly<sup>3</sup>]syringostatin B

syringomycins =

[D-Ser<sup>2</sup>,D-Dab<sup>3</sup>,L-Dab<sup>4</sup>,L-Arg<sup>5</sup>,L-Phe<sup>6</sup>]syringostatin

pseudomycins =

A, FA = 3-hydroxydecanoate

E, FA = 3-hydroxydodecanoate

G, FA = 3-hydroxytetradecanoate

pseudomycins =

[L-Asp<sup>3</sup>,L-Lys<sup>4</sup>,L-Orn<sup>5</sup>]syringostatin

A, FA = 3,4-dihydroxydodecanoate

B, FA = 3-hydroxytetradecanoate

C, FA = 3,4-dihydroxyhexadecanoate

D, FA = 3-hydroxyhexadecanoate

cormycin A =

[D-Orn<sup>2</sup>,L-Asn<sup>3</sup>,L-His<sup>9</sup>]syringostatin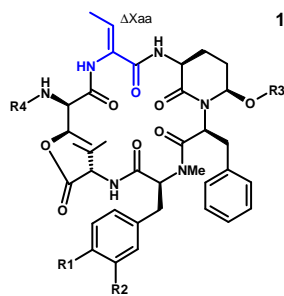**10 dolastatin family**

dolastatin 13

symplostatin 2

somamide A

somamide B

lyngbyastatin 4

lyngbyastatin 5

lyngbyastatin 6

lyngbyastatin 7

lyngbyastatin 8

lyngbyastatin 9

lyngbyastatin 10

bouillamide A

bouillamide B

molassamide B

R1 R2R3 R4

H H H A

OH H H B

OH H H C

OH H H D

OH H H E

OH H Me F

OH H H G

OH H H H

OH H H I

OH Br H J

OH H H K

OH Br H K

OH H H L

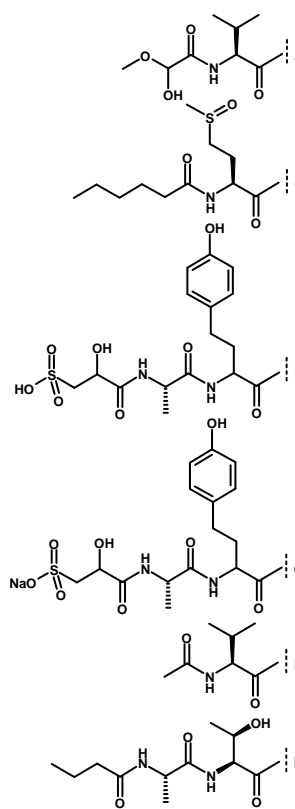

11 FR901277

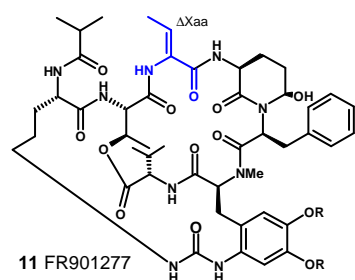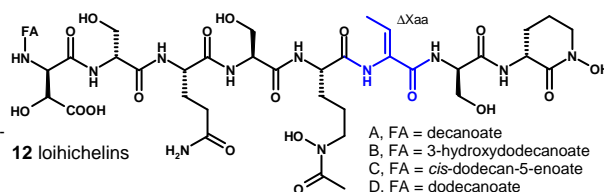**12 loihichelins**

A, FA = decanoate

B, FA = 3-hydroxydodecanoate

C, FA = cis-dodecan-5-enoate

D, FA = dodecanoate

E, FA = cis-tetradecan-7-enoate

F, FA = tetradecanoate

**13 lavendomycin**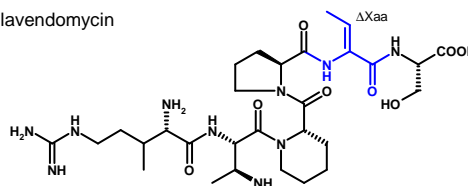**14 stenothricin**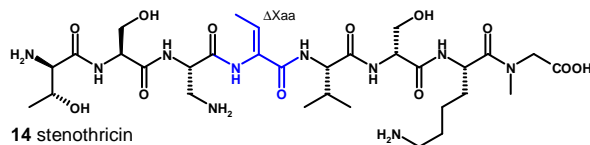**15 FK228 (FK901228)**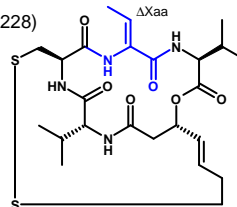**16 largamides**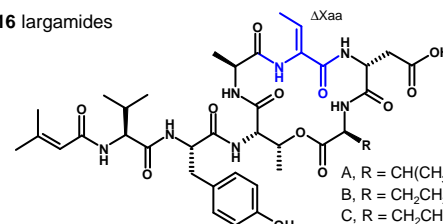A, R = CH(CH<sub>3</sub>)<sub>2</sub>B, R = CH<sub>2</sub>CH<sub>2</sub>-p-C<sub>6</sub>H<sub>4</sub>OHC, R = CH<sub>2</sub>CH<sub>2</sub>CH<sub>2</sub>-p-C<sub>6</sub>H<sub>4</sub>OH**17 kahalalide F**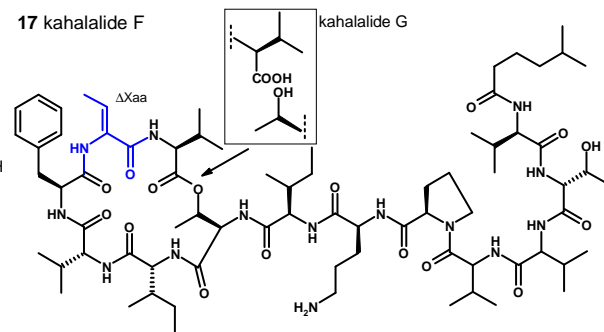

kahalalide G

**18 stendomycins**

(dominant component drawn)

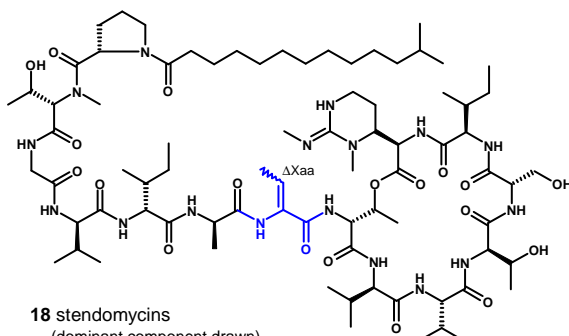

## 19 herbicolin A

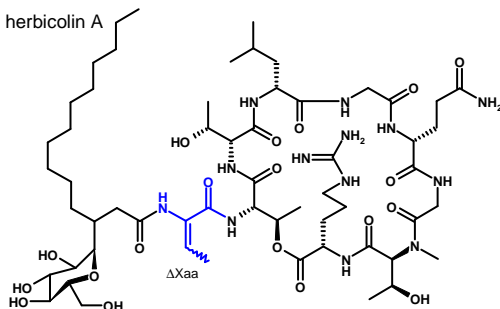

## 20 hassalidins

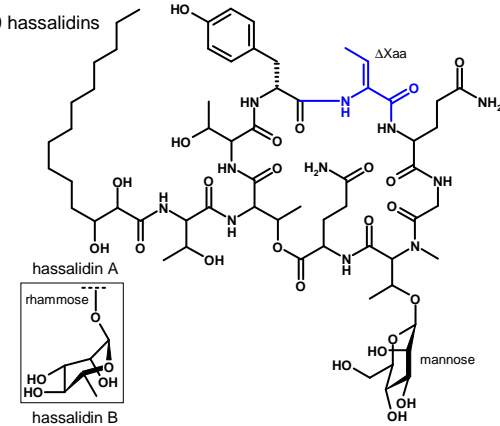

## 21 Sch 20562

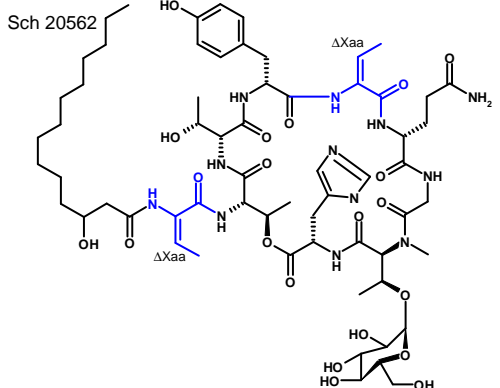

## 22 aciculitins

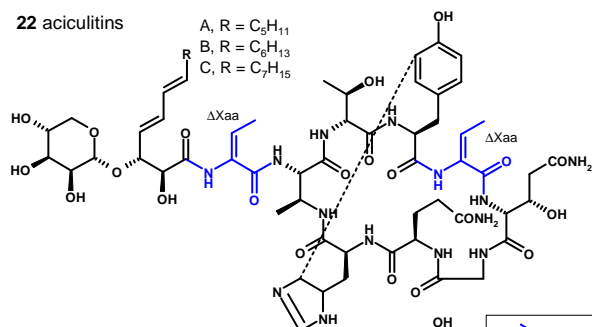

## 23 aciculitamides

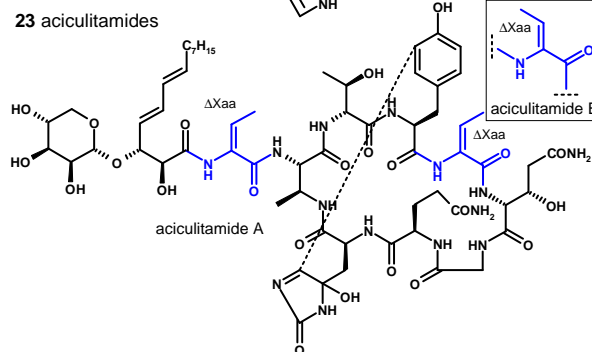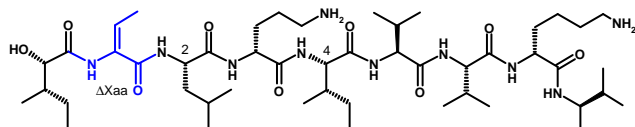

## 24 bogorols

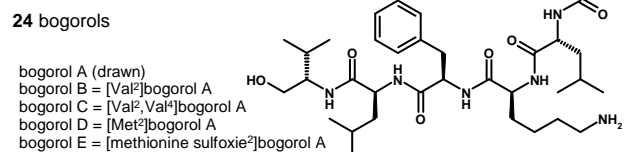

## 25 largamide H

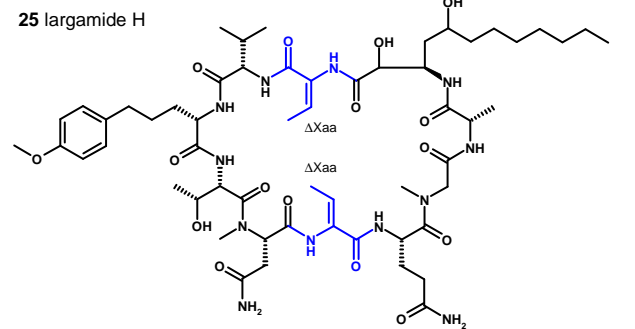

## 26 pahayokolides

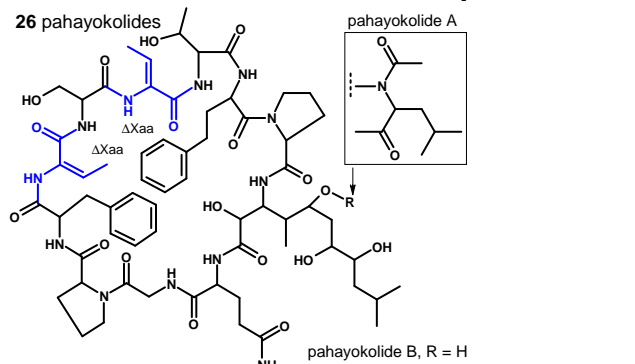

## 27 laxaphycin A

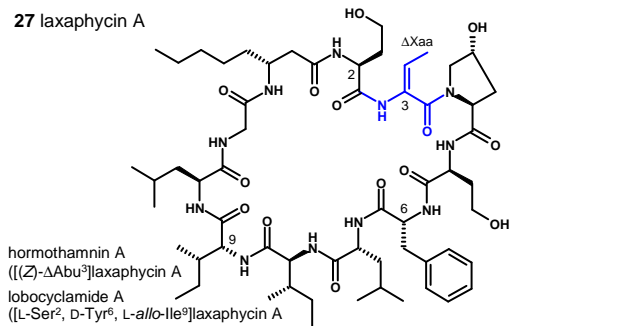

## 28 tumescenamides

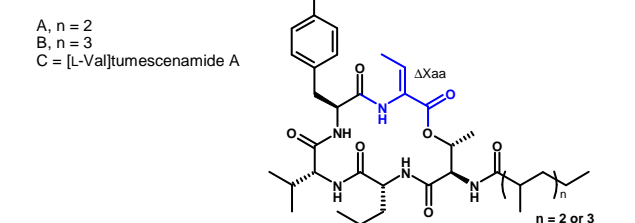

## 29 phomalide

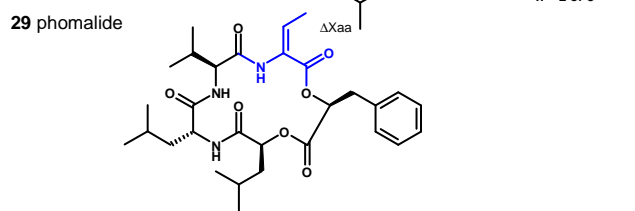

30 lasiodine

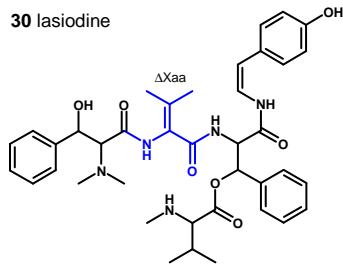

31 FR225659, FR225656

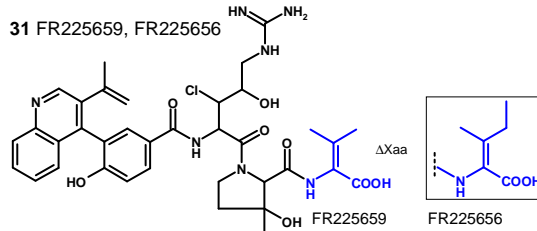

32 yaku'amides

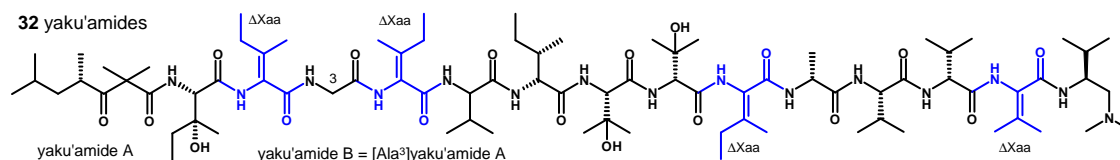33 antrimycin, cirratiomycins  
cirratiomycin A = [Leu<sup>9</sup>]antrimycin  
cirratiomycin B = antrimycin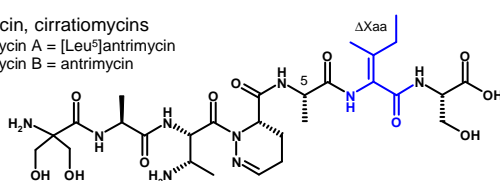

38 sclerotides

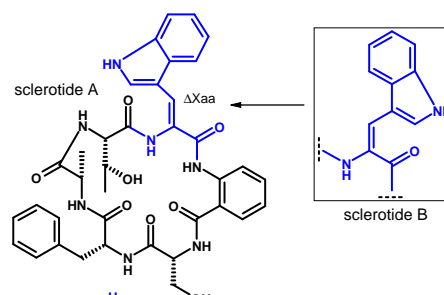

34 ostreogrycin A

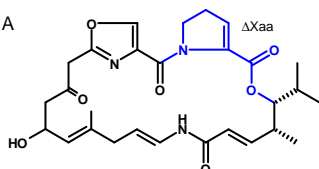

39 keramide F

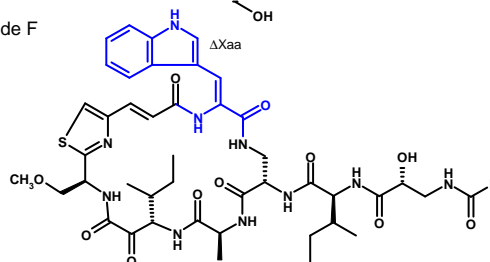

35 phomopsin A

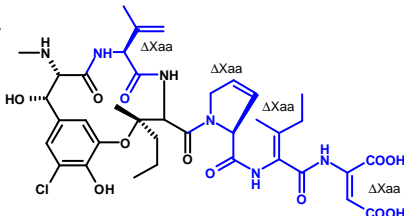

40 janthinocins

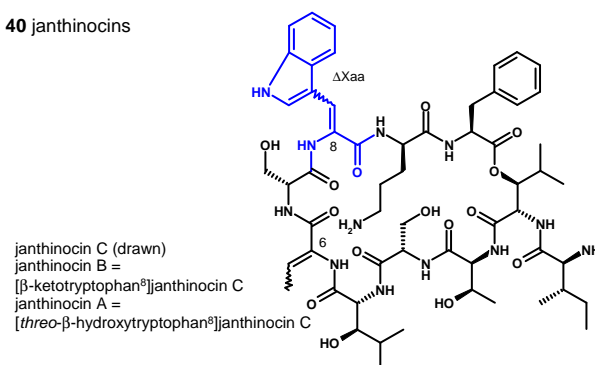

36 telomycin

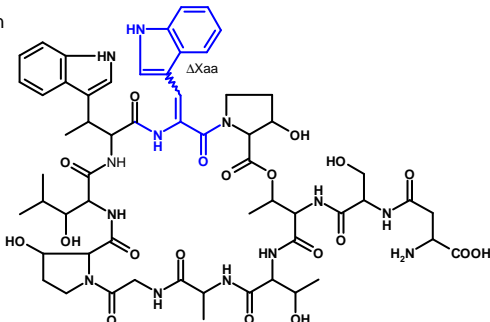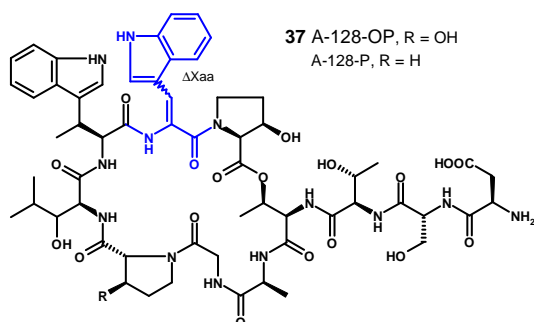

## 41 cyrmenins

- A, R = CH<sub>2</sub>CH(CH<sub>3</sub>)<sub>2</sub>  
 B<sub>1</sub>, R = CH<sub>2</sub>CH<sub>2</sub>CH<sub>3</sub>  
 B<sub>2</sub>, R = CH(CH<sub>3</sub>)<sub>2</sub>

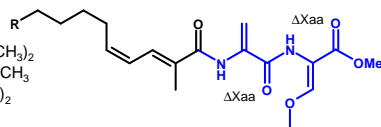

## 42 victorins

- R1 R2 R3  
 B, CH<sub>2</sub>Cl, OH, CH(OH)<sub>2</sub>  
 C, CHCl<sub>2</sub>, OH, CH(OH)<sub>2</sub>  
 D, CHCl<sub>2</sub>, H, CH(OH)<sub>2</sub>  
 E, CCl<sub>3</sub>, OH, CH(OH)<sub>2</sub>  
 M, CHCl<sub>2</sub>, OH, CH<sub>2</sub>NH<sub>2</sub>

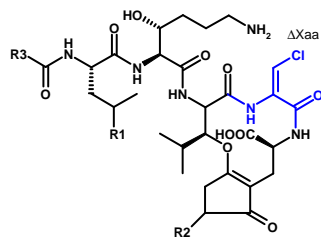

## 43 tuberactinomycins

- A, R1 = OH, R2 = OH  
 B (viomycin), R1 = H, R2 = OH  
 N, R1 = OH, R2 = H  
 O, R1 = H, R2 = H

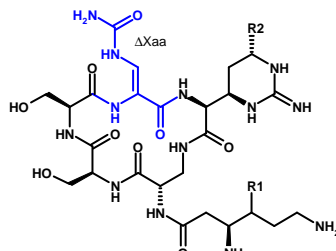

## 44 capreomycins

- capreomycin IA, R = OH  
 capreomycin IB, R = H

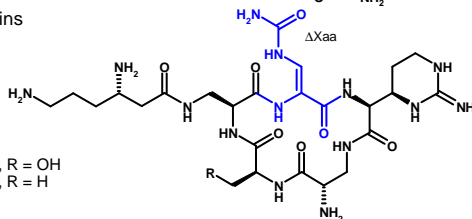45 callynormine A  
callyaerins A-H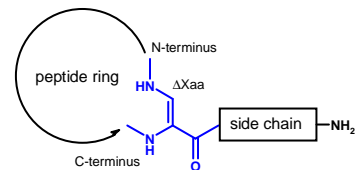

|                 | main chain (ring)      |     |     |     |     |     |     |     | side chain |     |     |     |     |
|-----------------|------------------------|-----|-----|-----|-----|-----|-----|-----|------------|-----|-----|-----|-----|
|                 | R1                     | R2  | R3  | R4  | R5  | R6  | R7  | R8  | C1         | C2  | C3  | C4  | C5  |
| Callynormine A  | Ile                    | Hyp | Val | Leu | Pro | Pro | Leu |     | Pro        | Phe | Leu |     |     |
| Callyaerins     |                        |     |     |     |     |     |     |     |            |     |     |     |     |
| A               | Ile                    | Hyp | Val | Ile | Leu | Pro | Pro | Leu | Pro        | Ile | Phe | Gly |     |
| B               | Ile                    | Hyp | Ile | Ile | Leu | Pro | Pro | Leu | Pro        | Ile | Ile |     |     |
| C               | His                    | Hyp | Leu | Leu | Pro | Pro | Val |     | Pro        | Leu | Phe | Gly |     |
| D               | Ile                    | Ile | Phe | Pro | Hyp | Pro | Leu |     | Pro        | Ile | Asn | Ala | Ile |
| E               | Leu                    | Pro | Phe | Phe | Pro | Pro | Val |     | Pro        | Ile | Ile | Gly |     |
| F               | Val                    | Pro | Val | Phe | Pro |     |     |     | Pro        | Leu | Phe | Ile |     |
| G               | Leu                    | Pro | Pro | Pro | Pro | Leu |     |     | Pro        | Phe | Phe | Phe |     |
| H               | Val                    | Pro | Val | Phe | Pro | Pro | Leu |     | Pro        | Ile |     |     |     |
| All the L form. | Hyp = 3-hydroxyproline |     |     |     |     |     |     |     |            |     |     |     |     |

## 46 celenamides

- A, R1 = Leu, R2 = OH  
 B, R1 = Val, R2 = OH  
 C, R1 = Leu, R2 = H  
 E, R1 = H, R2 = OH

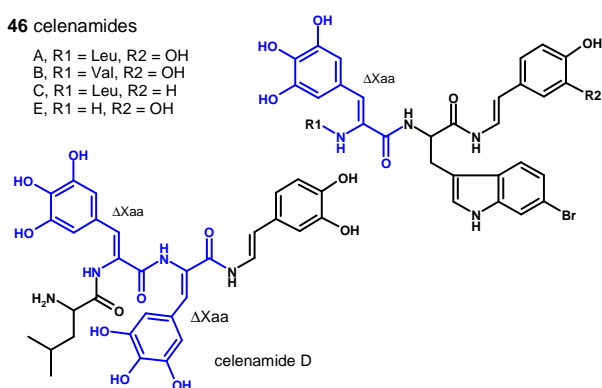

## 47 tunichromes

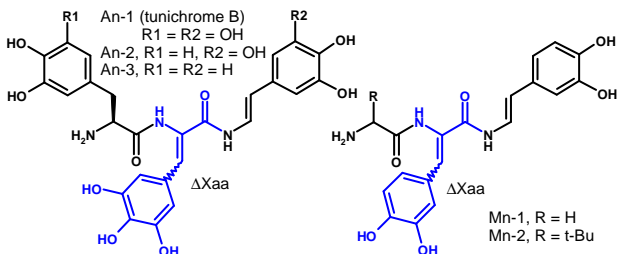

## 48 azinomycins

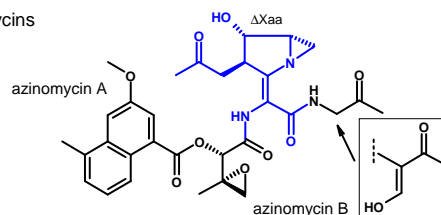

## 49 dityromycin, GE82832

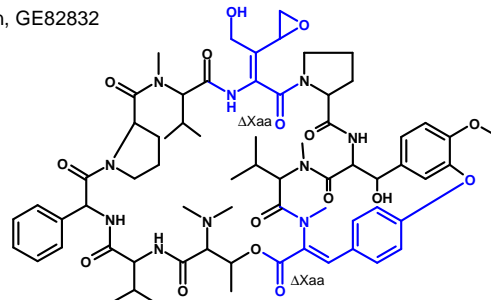

## 50 microcystin-LA

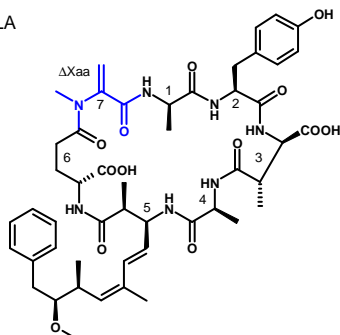

## 51 FR900359, YM254890-2

FR900359

R1 = CH(CH<sub>3</sub>)<sub>2</sub>R2 = CH<sub>2</sub>CH<sub>3</sub>

YM254890

R1 = R2 = CH<sub>3</sub>

YM254891

R1 = CH<sub>3</sub>R2 = CH<sub>2</sub>CH<sub>3</sub>

YM254892

R1 = CH<sub>3</sub>, R2 = CH<sub>2</sub>SCH<sub>3</sub>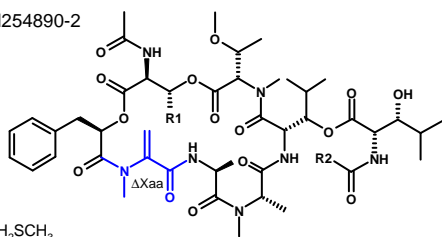

## 52 BE-22179

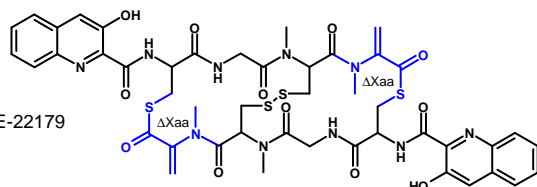

## 53 nodularins

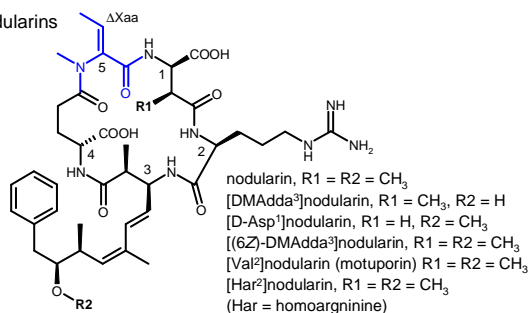

## 54 tentoxin

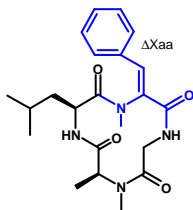

## 55 mutremdamide A

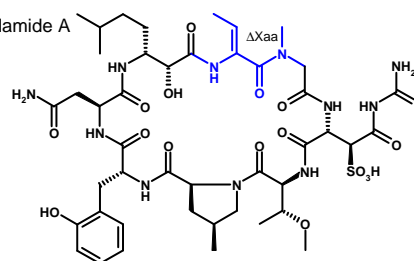

## 56 cyclothiazomycins

B1 [1 = Arg]

B2 [1 = Arg, 2 = (E)-ΔAbu]

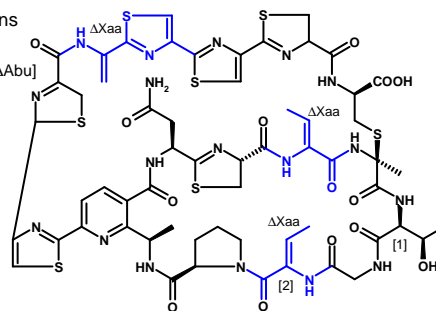

## 57

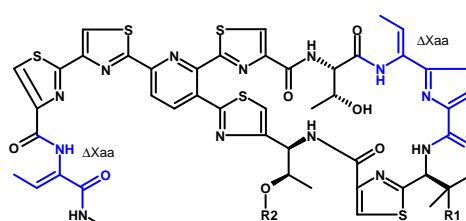

micrococcin P1

R1 = R2 = H

R3 = (R)-CH<sub>2</sub>CH(OH)CH<sub>3</sub>

micrococcin P2

R1 = R2 = H,

R3 = CH<sub>2</sub>COCH<sub>3</sub>

thiocillin I

R1 = OH, R2 = H

R3 = (R)-CH<sub>2</sub>CH(OH)CH<sub>3</sub>

thiocillin II

(unknown stereochemistry)

R1 = OH, R2 = CH<sub>3</sub>R3 = CH<sub>2</sub>CH(OH)CH<sub>3</sub>

thiocillin III

(unknown stereochemistry)

R1 = H, R2 = CH<sub>3</sub>R3 = CH<sub>2</sub>CH(OH)CH<sub>3</sub>

YM-266183

(unknown stereochemistry)

R1 = OH, R2 = H

R3 = CH<sub>2</sub>COCH<sub>3</sub>

YM-266184

(unknown stereochemistry)

R1 = OH, R2 = CH<sub>3</sub>R3 = CH<sub>2</sub>COCH<sub>3</sub>

## 58 nosiheptide

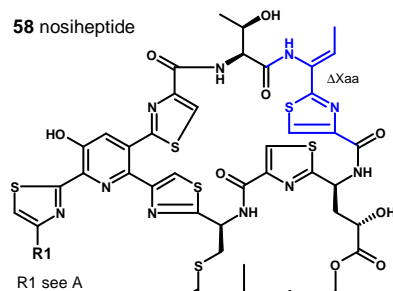

## 59

nocathiacin I (MJ347-81F4 A)  
 nocathiacin II  
 nocathiacin III  
 nocathiacin IV  
 thiazomycin A  
 thiazomycin B  
 thiazomycin C  
 thiazomycin D  
 MJ347-81F4 B  
 glycothiohexide  $\alpha$   
 O-Methyl-glycothiohexide  $\alpha$

| R1    | R2 | R3    | R4 |
|-------|----|-------|----|
| see A | H  | see a | OH |

|       |     |       |    |
|-------|-----|-------|----|
| see A | H   | see a | H  |
| see A | H   | H     | OH |
| CONH2 | H   | see a | OH |
| see A | H   | see b | OH |
| see A | H   | H     | H  |
| CONH2 | H   | see b | H  |
| see A | H   | see c | OH |
| see A | H   | see d | OH |
| CONH2 | H   | see a | H  |
| CONH2 | CH3 | see a | H  |

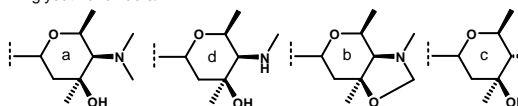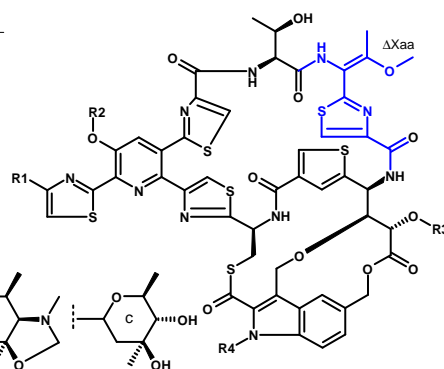

## 60

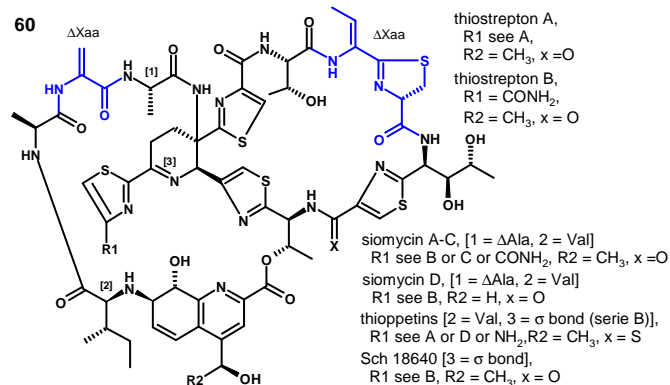

## 61 Sch40832

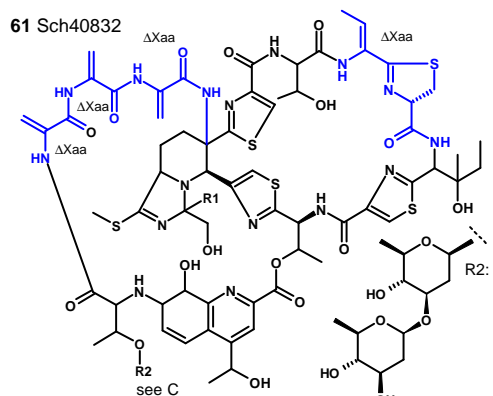

## 62

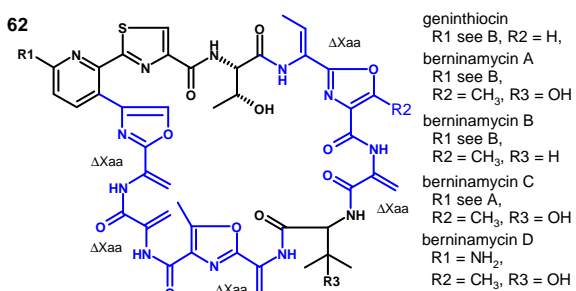

## 64

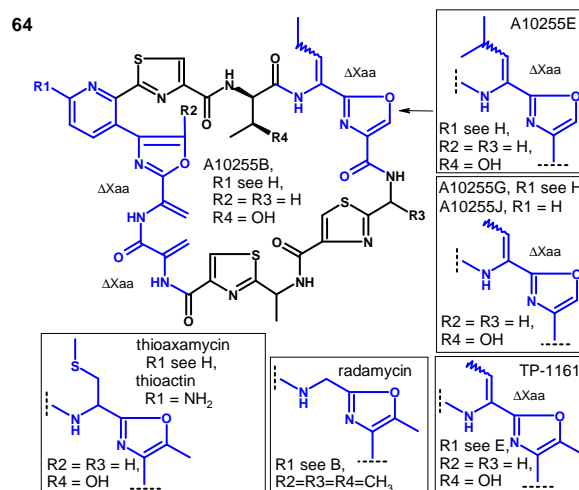

## 63

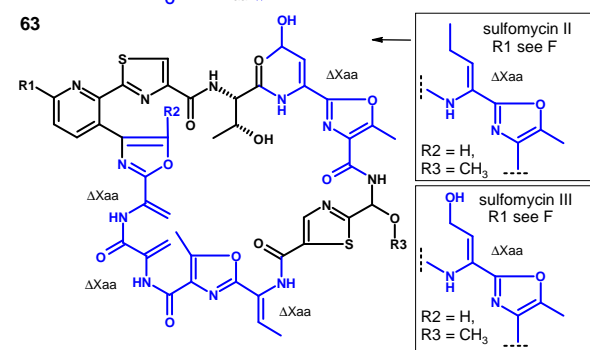

sulfomycin I: R1 = see F, R2 = H, R3 = CH<sub>3</sub>

methylsulfomycin I: R1 = F, R2 = R3 = CH<sub>3</sub>

promoinducin: R1 = H, R2 = H, R3 = CH<sub>3</sub>

## 65

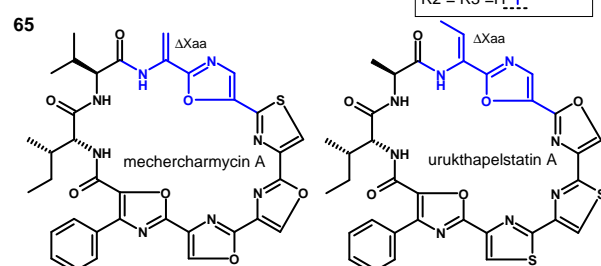

Supplement: 726_2014_1846_MOESM1_ESM.pdf [file 726_2014_1846_MOESM1_ESM.pdf]
